# Supplementary material
Source: PubMed Central journal article supplement (PMC6344267)
Supplement: NIHMS1515962-supplement-Graphic_Abstract.pdf [file NIHMS1515962-supplement-Graphic_Abstract.pdf]

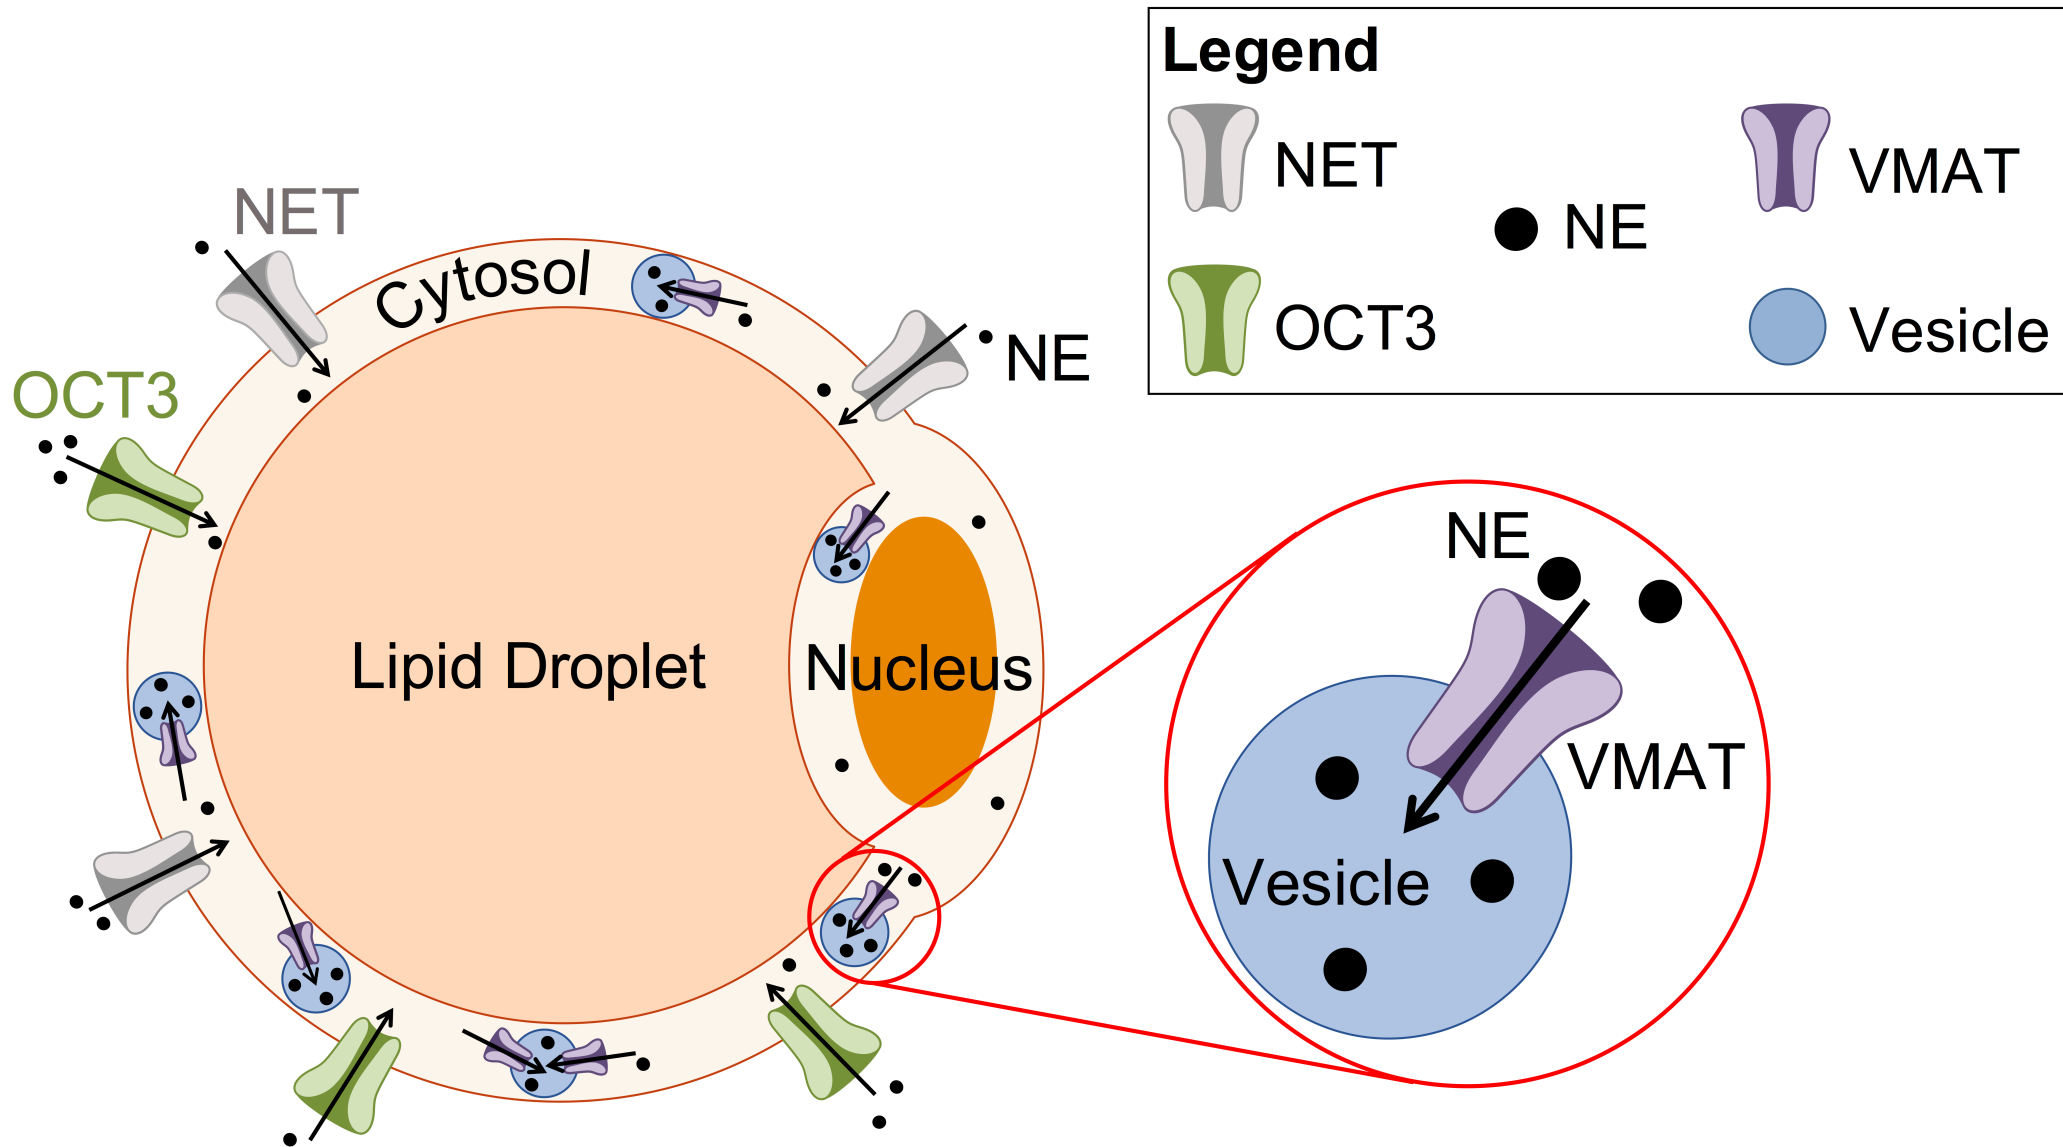

Proposed NE storage mechanism in PVAT adipocytes. NE enters the cell through the plasma membrane transporters OCT3 and NET. NE is stored in vesicles within the cytoplasm by VMAT. Diagram not to scale.
