# Supplementary material
Source: PubMed Central journal article supplement (PMC6344267)
Supplement: NIHMS1515962-supplement-Major_Resources_Table.pdf [file NIHMS1515962-supplement-Major_Resources_Table.pdf]

## Major Resources Tables

### Animals

| Species/Strain     | Vendor or Source | Background Strain | Sex  |
|--------------------|------------------|-------------------|------|
| Sprague-Dawley Rat | Charles River    | --                | Male |

### Antibodies

| Target antigen | Vendor            | Catalog #  | Working concentration | Lot #       |
|----------------|-------------------|------------|-----------------------|-------------|
| NE             | Abcam             | Ab8887     | 200 mg/L              | GR3192883-3 |
| VMAT1          | Immunostar        | 20041      | 1:500 of Whole Serum  | 932001      |
| VMAT2          | Immunostar        | 20042      | 1:250 of Whole Serum  | 1321001     |
| VMAT2          | Novus Biologicals | NB100-1479 | 5 mg/L                | --          |

### Important chemicals

| Chemical                 | Vendor                              | Catalog # | Working concentration | Lot #        |
|--------------------------|-------------------------------------|-----------|-----------------------|--------------|
| Collagenase type I       | Worthington Biochemical Corporation | LS004196  | 1 mg/mL               | 45D15720     |
| Corticosterone           | Tocris Bioscience                   | 3685      | 1 mM                  | 1C/161089    |
| Mini202                  | Abcam                               | Ab120867  | 500 $\mu$ M           | APN12153-5-5 |
| Nisoxetine hydrochloride | Millipore-Sigma                     | N151      | 1 $\mu$ M             | 042M4604V    |
| Papain                   | Worthington Biochemical Corporation | LS003126  | 600 units/mL          | 37E175010    |
| Rose Bengal              | Tocris Bioscience                   | 5168      | 100 $\mu$ M           | 1A/181662    |
