# Supplementary material
Source: PubMed Central journal article supplement (PMC6344267)
Supplement: NIHMS1515962-supplement-Supplemental_figures.pdf [file NIHMS1515962-supplement-Supplemental_figures.pdf]

## Supplemental Figure I

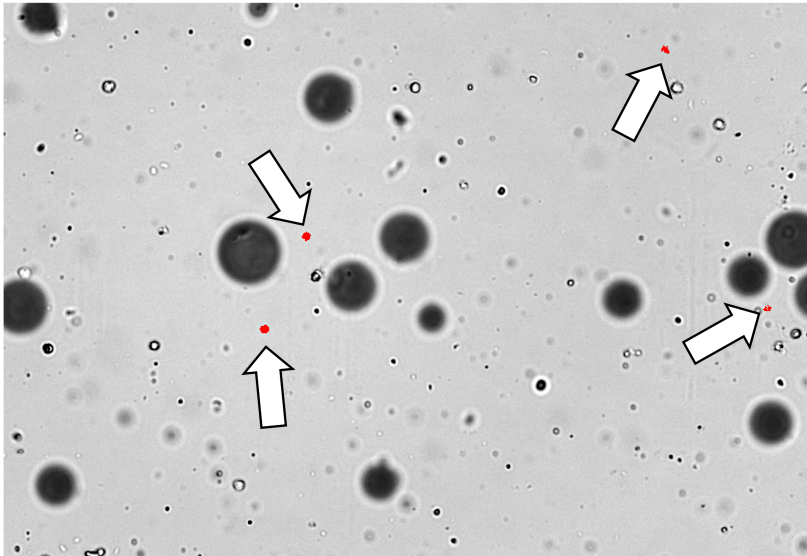

CD68 staining of MRPVAT digest as indicated by the red dots and pointed by the arrows. The dark spheres are adipocytes. Representative of three separate experiments on individual rats.

Supplemental Figure II

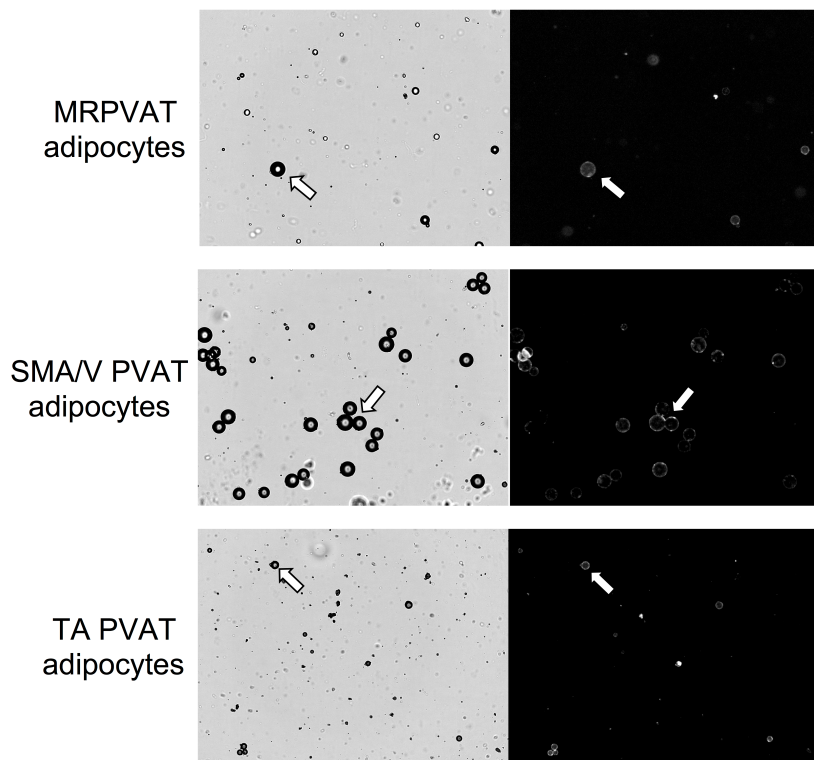

Collagenase-isolated adipocytes have intact cell membranes as determined by fluorescent wheat germ agglutinin staining (right). White arrows point to isolated adipocytes from the MRPVAT (top row), SMA/V PVAT (middle row), and TA PVAT (bottom row). Brightfield images included (left) for reference.

Representative of three separate experiments on individual rats.

Supplemental Figure III

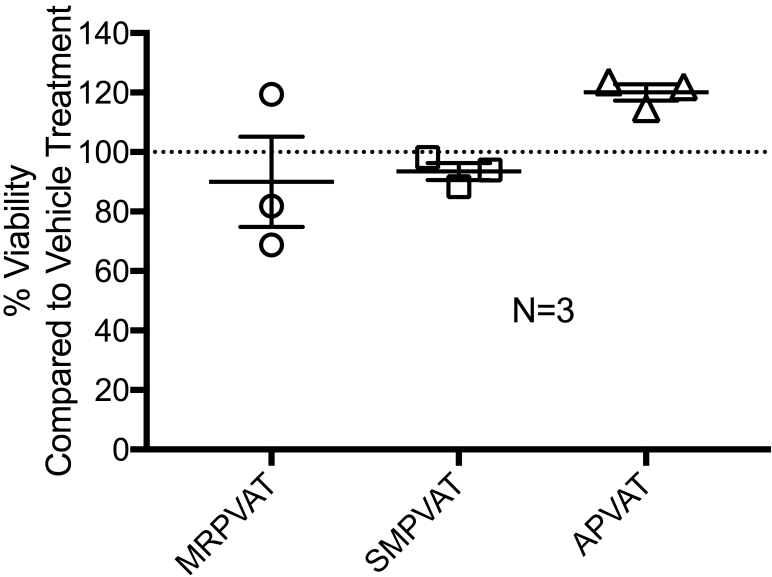

Adipocyte viability from MRPVAT, SMPVAT, and APVAT as assessed by AO/PI staining and quantified on a Vision® Cellometer. Representative of three separate experiments on individual rats.

Supplemental Figure IV

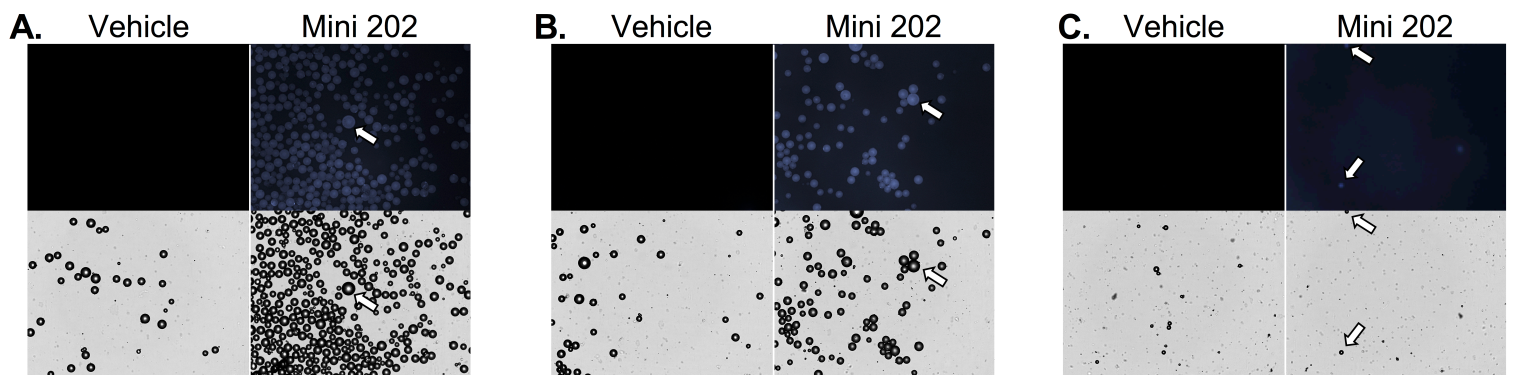

Uptake of Mini 202 by adipocytes isolated from MRPVAT (A), SMA/VPVAT (B), and APVAT (C) as assessed on a Vision® Cellometer. Fluorescent images (top row) with corresponding bright field images (bottom row). Representative of three separate experiments on individual rats.

## Supplemental Figure V

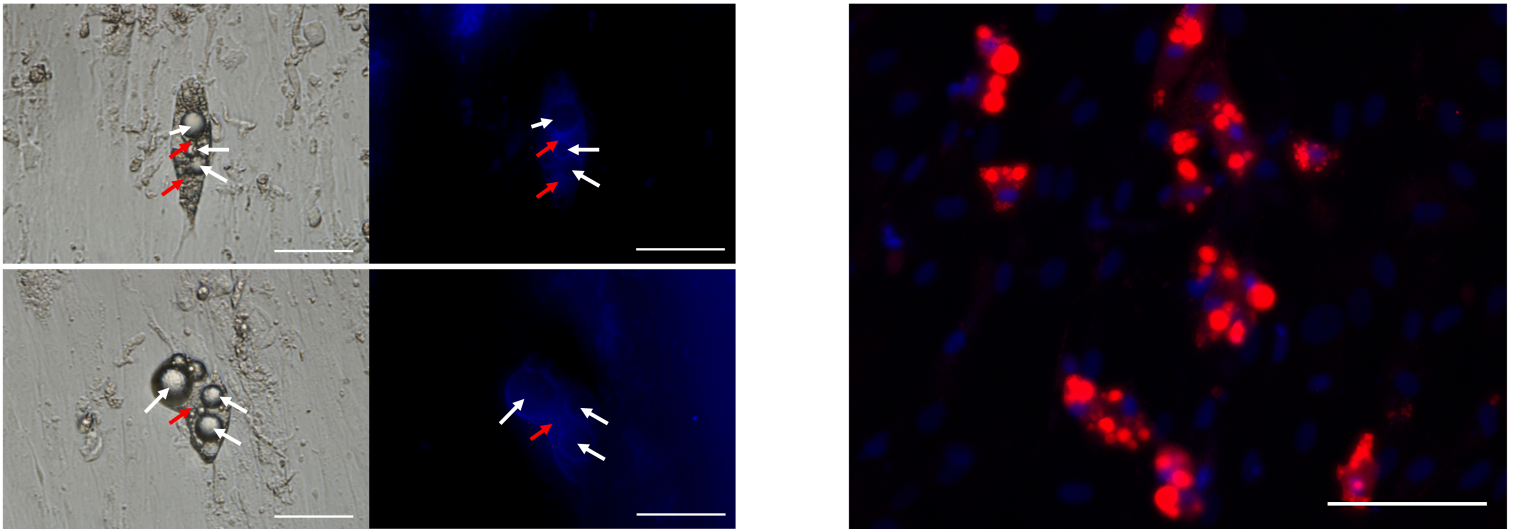

Uptake of Mini 202 by adipocytes differentiated from adipocyte precursor cells isolated from the SVF of MRPVAT (**A**) with the fluorescent (right) and corresponding brightfield (left). White arrows point to lipid droplets and red point to cytoplasm. Scale bar = 50  $\mu\text{m}$ . LipidTox staining of lipid (red) to confirm the differentiation of adipocytes (**B**). Scale bar = 100  $\mu\text{m}$ . Representative of three separate experiments on individual rats.
